# Supplementary material for: Do Grandmaternal Smoking Patterns Influence the Etiology of Childhood Asthma?
Source: PubMed Central journal article supplement — Chest. 2013 Oct 24;145(6):1213–8. doi: 10.1378/chest.13-1371 (PMC4042509; doi:10.1378/chest.13-1371), 2013-10-24
Supplement: chest_145_6_1213_ds01.pdf [file chest_145_6_1213_ds01.pdf]

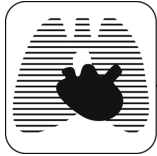

## Do Grandmaternal Smoking Patterns Influence the Etiology of Childhood Asthma?

Laura L. Miller, MSc; John Henderson, MD; Kate Northstone, PhD; Marcus Pembrey, MD; and Jean Golding, PhD

Table 1: n (%) and effect sizes for each category of wheezing and methacholine challenge and mean (sd) and mean differences for each lung function outcome by paternal exposure to his mothers' smoking in pregnancy: offspring of smoking mothers. [The non-smoking grandparent is the comparison group throughout].

|                           |                         | PGM-M+         | PGM+M+         | Model 1: OR (95% CI)   | M2: AOR (95% CI)       | M3: AOR (95% CI)       | M4: AOR (95% CI)      |
|---------------------------|-------------------------|----------------|----------------|------------------------|------------------------|------------------------|-----------------------|
| Wheezing trajectory       | Never                   | 421 (64.3)     | 426 (65.0)     | 1.00 Ref               | 1.00 Ref               | 1.00 Ref               | 1.00 Ref              |
|                           | Early only (6m)         | 124 (18.9)     | 121 (18.5)     | 0.96 (0.73, 1.28)      | 0.99 (0.74, 1.32)      | 0.97 (0.71, 1.31)      | 0.99 (0.72, 1.35)     |
|                           | Late only (42m)         | 66 (10.1)      | 57 (8.7)       | 0.85 (0.58, 1.25)      | 0.84 (0.57, 1.24)      | 0.82 (0.54, 1.22)      | 0.80 (0.53, 1.21)     |
|                           | Persistent              | 44 (6.7)       | 51 (7.8)       | 1.15 (0.75, 1.75)      | 1.25 (0.80, 1.93)      | 1.25 (0.79, 1.97)      | 1.18 (0.74, 1.86)     |
| Methacholine              | <0                      | 58 (19.9)      | 55 (18.9)      | 1.00 Ref               | 1.00 Ref               | 1.00 Ref               | 1.00 Ref              |
|                           | 1 <sup>st</sup> tertile | 89 (30.5)      | 76 (26.1)      | 0.90 (0.56, 1.45)      | 0.86 (0.53, 1.39)      | 0.83 (0.48, 1.41)      | 0.82 (0.47, 1.43)     |
|                           | 2 <sup>nd</sup> tertile | 72 (24.7)      | 74 (25.4)      | 1.08 (0.66, 1.77)      | 1.02 (0.62, 1.67)      | 1.10 (0.63, 1.90)      | 1.09 (0.62, 1.93)     |
|                           | 3 <sup>rd</sup> tertile | 73 (25.0)      | 86 (29.6)      | 1.24 (0.77, 2.01)      | 1.14 (0.70, 1.85)      | 1.05 (0.61, 1.80)      | 1.08 (0.61, 1.89)     |
| Lung function (sd scores) | FVC                     | 0.040 (0.940)  | 0.068 (1.058)  | 0.028 (-0.102, 0.158)  | 0.031 (-0.101, 0.163)  | 0.061 (-0.082, 0.204)  | 0.090 (-0.055, 0.235) |
|                           | FEV 1                   | -0.036 (1.014) | -0.013 (1.019) | 0.023 (-0.109, 0.156)  | 0.024 (-0.111, 0.159)  | 0.062 (-0.083, 0.206)  | 0.095 (-0.052, 0.242) |
|                           | FEV 25-75               | -0.088 (1.045) | -0.107 (0.998) | -0.019 (-0.152, 0.113) | -0.025 (-0.160, 0.110) | -0.009 (-0.153, 0.136) | 0.004 (-0.144, 0.152) |
|                           | FEV1:FVC ratio          | 0.875 (0.069)  | 0.876 (0.068)  | 0.001 (-0.008, 0.010)  | 0.001 (-0.008, 0.010)  | 0.001 (-0.008, 0.011)  | 0.002 (-0.008, 0.012) |

Model 1: Unadjusted

Model 2: Model 1 + family history of asthma

Model 3: Model 2 + parity + gestation + breastfeeding + maternal education + amount mother smoked during pregnancy

Model 4: Model 3 + paternal smoking during pregnancy + child's passive exposure at ages <2 years and at 2-8 years

Online supplements are not copyedited prior to posting.



g-Table 2: n (%) and effect sizes for each category of wheezing and methacholine challenge and mean (sd) and mean differences for each lung function outcome by paternal exposure to his mothers' smoking in pregnancy: offspring of smoking mothers. [The non-smoking grandparent is the comparison group throughout].

| Boys                           |                             | PGM-M+         | PGM+M+         | Model 1: OR (95% CI)   | M2: AOR (95% CI)       | M3: AOR (95% CI)       | M4: AOR (95% CI)       |
|--------------------------------|-----------------------------|----------------|----------------|------------------------|------------------------|------------------------|------------------------|
|                                |                             | N (% affected) | N (% affected) |                        |                        |                        |                        |
| Wheezing trajectory            | Never                       | 208 (58.3)     | 204 (61.5)     | 1.00 Ref               | 1.00 Ref               | 1.00 Ref               | 1.00 Ref               |
|                                | Early only (6m)             | 90 (25.2)      | 66 (19.9)      | 0.75 (0.52, 1.08)      | 0.77 (0.52, 1.12)      | 0.78 (0.52, 1.16)      | 0.80 (0.53, 1.20)      |
|                                | Late only (42m)             | 33 (9.2)       | 32 (9.6)       | 0.99 (0.59, 1.67)      | 0.96 (0.56, 1.63)      | 0.88 (0.50, 1.55)      | 0.84 (0.47, 1.49)      |
|                                | Persistent                  | 26 (7.3)       | 30 (9.0)       | 1.18 (0.67, 2.06)      | 1.30 (0.73, 2.30)      | 1.28 (0.70, 2.36)      | 1.24 (0.67, 2.31)      |
| Methacholine (0 plus tertiles) | f8lf126<0                   | 28 (18.5)      | 30 (18.9)      |                        |                        |                        |                        |
|                                | 1 <sup>st</sup> tertile     | 41 (27.2)      | 39 (24.5)      | 0.89 (0.45, 1.75)      | 0.93 (0.42, 1.66)      | 0.91 (0.42, 1.94)      | 0.96 (0.43, 2.12)      |
|                                | 2 <sup>nd</sup> tertile     | 43 (28.5)      | 42 (26.4)      | 0.91 (0.47, 1.78)      | 0.84 (0.42, 1.65)      | 1.07 (0.51, 2.28)      | 1.06 (0.48, 2.33)      |
|                                | 3 <sup>rd</sup> tertile     | 39 (25.8)      | 48 (30.2)      | 1.15 (0.59, 2.24)      | 1.05 (0.53, 2.06)      | 1.09 (0.52, 2.32)      | 1.20 (0.55, 2.64)      |
| Lung function                  | FVC                         | -0.039 (0.965) | -0.060 (1.090) | -0.020 (-0.204, 0.163) | -0.009 (-0.196, 0.178) | 0.020 (-0.183, 0.224)  | 0.042 (-0.165, 0.249)  |
|                                | FEV <sub>1</sub>            | -0.064 (1.017) | -0.119 (1.060) | -0.055 (-0.240, 0.130) | -0.051 (-0.241, 0.139) | -0.015 (-0.217, 0.188) | 0.012 (-0.192, 0.217)  |
|                                | FEV <sub>25-75</sub>        | -0.048 (1.038) | -0.128 (1.003) | -0.081 (-0.262, 0.101) | -0.093 (-0.279, 0.092) | -0.074 (-0.270, 0.122) | -0.058 (-0.257, 0.142) |
|                                | FEV <sub>1</sub> :FVC ratio | 0.872 (0.068)  | 0.871 (0.072)  | -0.001 (-0.013, 0.012) | -0.002 (-0.014, 0.011) | -0.001 (-0.015, 0.012) | -0.001 (-0.015, 0.013) |

Model 1: Unadjusted

Model 2: Model 1 + family history of asthma

Model 3: Model 2 + parity + gestation + breastfeeding + maternal education + amount mother smoked during pregnancy

Model 4: Model 3 + paternal smoking during pregnancy + child's passive exposure at ages <2 years and at 2-8 years

*Online supplements are not copyedited prior to posting.*

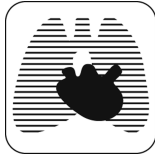

g- Table 3: n (%) and effect sizes for each category of wheezing and methacholine challenge and mean (sd) and mean differences for each lung function outcome by paternal exposure to his mothers' smoking in pregnancy: offspring of smoking mothers. [The non-smoking grandparent is the comparison group throughout]

| Girls               |                         | PGM-M+         | PGM+M+         | Model 1: OR (95% CI)  | M2: AOR (95% CI)      | M3: AOR (95% CI)      | M4: AOR (95% CI)      |
|---------------------|-------------------------|----------------|----------------|-----------------------|-----------------------|-----------------------|-----------------------|
| Wheezing trajectory | Never                   | 213 (71.5)     | 222 (68.7)     | 1.00 Ref              | 1.00 Ref              | 1.00 Ref              | 1.00 Ref              |
|                     | Early only (6m)         | 34 (11.4)      | 55 (17.0)      | 1.55 (0.97, 2.48)     | 1.56 (0.97, 2.50)     | 1.43 (0.87, 2.38)     | 1.45 (0.87, 2.41)     |
|                     | Late only (42m)         | 33 (11.1)      | 25 (7.7)       | 0.73 (0.42, 1.26)     | 0.73 (0.42, 1.29)     | 0.77 (0.43, 1.39)     | 0.78 (0.42, 1.43)     |
|                     | Persistent              | 18 (6.0)       | 21 (6.5)       | 1.12 (0.58, 2.16)     | 1.18 (0.60, 2.33)     | 1.27 (0.63, 2.55)     | 1.12 (0.55, 2.29)     |
| Methacholine        | <0                      | 30 (21.3)      | 25 (18.9)      |                       |                       |                       |                       |
|                     | 1 <sup>st</sup> tertile | 48 (34.0)      | 37 (28.0)      | 0.93 (0.47, 1.83)     | 0.89 (0.45, 1.78)     | 0.74 (0.33, 1.62)     | 0.69 (0.30, 1.57)     |
|                     | 2 <sup>nd</sup> tertile | 29 (20.6)      | 32 (24.2)      | 1.32 (0.64, 2.75)     | 1.28 (0.61, 2.67)     | 1.08 (0.46, 2.55)     | 1.15 (0.47, 2.78)     |
|                     | 3 <sup>rd</sup> tertile | 34 (24.1)      | 38 (28.8)      | 1.34 (0.66, 2.71)     | 1.23 (0.60, 2.50)     | 1.00 (0.44, 2.25)     | 1.00 (0.42, 2.38)     |
| Lung function       | FVC                     | 0.126 (0.906)  | 0.222 (0.998)  | 0.096 (-0.085, 0.277) | 0.088 (-0.096, 0.271) | 0.116 (-0.086, 0.317) | 0.142 (-0.064, 0.348) |
|                     | FEV 1                   | -0.005 (1.012) | 0.118 (0.953)  | 0.122 (-0.066, 0.311) | 0.119 (-0.072, 0.310) | 0.145 (-0.065, 0.354) | 0.170 (-0.046, 0.387) |
|                     | FEV 25-75               | -0.132 (1.054) | -0.082 (0.995) | 0.050 (-0.145, 0.245) | 0.052 (-0.145, 0.250) | 0.053 (-0.166, 0.272) | 0.055 (-0.170, 0.281) |
|                     | FEV1:FVC ratio          | 0.879 (0.070)  | 0.883 (0.062)  | 0.004 (-0.008, 0.017) | 0.005 (-0.008, 0.017) | 0.004 (-0.010, 0.018) | 0.003 (-0.011, 0.018) |

Model 1: Unadjusted

Model 2: Model 1 + family history of asthma

Model 3: Model 2 + parity + gestation + breastfeeding + maternal education + amount mother smoked during pregnancy

Model 4: Model 3 + paternal smoking during pregnancy + child's passive exposure at ages <2 years and at 2-8 years

*Online supplements are not copyedited prior to posting.*



g-Table 4: n (%) and effect sizes for each category of wheezing and methacholine challenge and mean (sd) and mean differences for each lung function outcome by maternal exposure to her mothers' smoking in pregnancy: offspring of smoking mothers. [The non-smoking grandparent is the comparison group throughout]

|                           |                         | MGM-M+         | MGM+M+         | Model 1: OR (95% CI)   | M2: AOR (95% CI)       | M3: AOR (95% CI)      | M4: AOR (95% CI)      |
|---------------------------|-------------------------|----------------|----------------|------------------------|------------------------|-----------------------|-----------------------|
| Wheezing trajectory       | Never                   | 618 (65.0)     | 571 (65.0)     | 1.00 Ref               | 1.00 Ref               | 1.00 Ref              | 1.00 Ref              |
|                           | Early only (6m)         | 173 (18.2)     | 158 (18.0)     | 0.99 (0.77, 1.26)      | 0.97 (0.75, 1.24)      | 0.96 (0.73, 1.25)     | 1.05 (0.80, 1.39)     |
|                           | Late only (42m)         | 92 (9.7)       | 79 (9.0)       | 0.93 (0.67, 1.28)      | 0.88 (0.63, 1.22)      | 0.89 (0.63, 1.26)     | 0.86 (0.60, 1.23)     |
|                           | Persistent              | 68 (7.1)       | 71 (8.0)       | 1.13 (0.80, 1.61)      | 1.13 (0.79, 1.63)      | 1.13 (0.77, 1.67)     | 1.04 (0.69, 1.56)     |
| Methacholine              | <0                      | 86 (20.2)      | 75 (20.7)      | 1.00 Ref               | 1.00 Ref               | 1.00 Ref              | 1.00 Ref              |
|                           | 1 <sup>st</sup> tertile | 103 (24.2)     | 115 (31.7)     | 1.28 (0.85, 1.93)      | 1.29 (0.85, 1.95)      | 1.30 (0.83, 2.05)     | 1.45 (0.89, 2.35)     |
|                           | 2 <sup>nd</sup> tertile | 123 (28.9)     | 74 (20.4)      | 0.69 (0.45, 1.05)      | 0.68 (0.44, 1.05)      | 0.76 (0.48, 1.22)     | 0.76 (0.46, 1.25)     |
|                           | 3 <sup>rd</sup> tertile | 114 (26.8)     | 99 (27.3)      | 1.00 (0.66, 1.50)      | 0.93 (0.61, 1.41)      | 0.79 (0.50, 1.26)     | 0.86 (0.52, 1.41)     |
| Lung function (sd scores) | FVC                     | 0.070 (0.984)  | 0.046 (1.027)  | -0.024 (-0.136, 0.088) | -0.015 (-0.129, 0.100) | 0.026 (-0.100, 0.152) | 0.028 (-0.104, 0.160) |
|                           | FEV 1                   | -0.005 (1.015) | -0.038 (1.031) | -0.033 (-0.148, 0.081) | -0.015 (-0.132, 0.102) | 0.055 (-0.073, 0.184) | 0.068 (-0.066, 0.201) |
|                           | FEV 25-75               | -0.092 (1.037) | -0.118 (0.980) | -0.026 (-0.139, 0.087) | -0.001 (-0.116, 0.114) | 0.050 (-0.075, 0.176) | 0.059 (-0.073, 0.191) |
|                           | FEV1:FVC ratio          | 0.876 (0.068)  | 0.875 (0.066)  | -0.000 (-0.008, 0.007) | 0.001 (-0.007, 0.009)  | 0.004 (-0.005, 0.012) | 0.005 (-0.004, 0.013) |

Model 1: Unadjusted

Model 2: Model 1 + family history of asthma

Model 3: Model 2 + parity + gestation + breastfeeding + maternal education + amount mother smoked during pregnancy

Model 4: Model 3 + paternal smoking during pregnancy + child's passive exposure at ages <2 years and at 2-8 years

*Online supplements are not copyedited prior to posting.*



Table 5: n (%) and effect sizes for each category of wheezing and methacholine challenge and mean (sd) and mean differences for each lung function outcome by maternal exposure to her mothers' smoking in pregnancy: male offspring of smoking mothers. [The non-smoking grandparent is the comparison group throughout].

| Boys                           |                         | MGM-M+         | MGM+M+         | Model 1: OR (95% CI)   | M2: AOR (95% CI)       | M3: AOR (95% CI)       | M4: AOR (95% CI)      |
|--------------------------------|-------------------------|----------------|----------------|------------------------|------------------------|------------------------|-----------------------|
| Wheezing trajectory            | Never                   | 307 (62.3)     | 302 (62.9)     | 1.00 Ref               | 1.00 Ref               | 1.00 Ref               | 1.00 Ref              |
|                                | Early only (6m)         | 101(20.5)      | 100 (20.5)     | 1.01 (0.73, 1.38)      | 0.97 (0.70, 1.34)      | 0.99(0.70, 1.41)       | 1.09 (0.76, 1.57)     |
|                                | Late only (42m)         | 45 (9.1)       | 42 (8.6)       | 0.95 (0.61, 1.49)      | 0.88 (0.55, 1.39)      | 0.87 (0.53, 1.43)      | 0.82 (0.49, 1.38)     |
|                                | Persistent              | 40 (8.1)       | 44 (9.0)       | 1.12 (0.71, 1.77)      | 1.08 (0.67, 1.73)      | 1.20 (0.71, 2.00)      | 1.06 (0.62, 1.80)     |
| Methacholine (0 plus tertiles) | <0                      | 45 (19.7)      | 38 (19.1)      | 1.00 Ref               | 1.00 Ref               | 1.00 Ref               | 1.00 Ref              |
|                                | 1 <sup>st</sup> tertile | 57 (24.9)      | 59 (29.7)      | 1.23 (0.70, 2.16)      | 1.24 (0.69, 2.21)      | 1.27 (0.67, 2.40)      | 1.54 (0.76, 3.11)     |
|                                | 2 <sup>nd</sup> tertile | 65 (28.4)      | 46 (23.1)      | 0.84 (0.47, 1.49)      | 0.85 (0.47, 1.54)      | 1.04 (0.54, 1.99)      | 1.03 (0.50, 2.11)     |
|                                | 3 <sup>rd</sup> tertile | 62 (27.1)      | 56 (28.1)      | 1.07 (0.61, 1.88)      | 0.99 (0.55, 1.77)      | 0.91 (0.47, 1.75)      | 0.95 (0.46, 1.94)     |
| Lung function                  | FVC                     | -0.040 (1.017) | 0.034 (1.087)  | 0.073 (-0.087, 0.234)  | 0.093 (-0.073, 0.258)  | 0.113 (-0.071, 0.298)  | 0.098 (-0.094, 0.290) |
|                                | FEV 1                   | -0.074 (1.036) | -0.053 (1.084) | 0.021 (-0.141, 0.183)  | 0.048 (-0.120, 0.215)  | 0.103 (-0.082, 0.288)  | 0.107 (-0.085, 0.298) |
|                                | FEV 25-75               | -0.088 (1.027) | -0.108 (1.009) | -0.021 (-0.177, 0.135) | 0.011 (-0.149, 0.170)  | 0.063 (-0.112, 0.238)  | 0.076 (-0.107, 0.259) |
|                                | FEV1:FVC ratio          | 0.872 (0.069)  | 0.866 (0.070)  | -0.005 (-0.016, 0.005) | -0.005 (-0.016, 0.006) | -0.001 (-0.013, 0.011) | 0.001 (-0.012, 0.013) |

Model 1: Unadjusted

Model 2: Model 1 + family history of asthma

Model 3: Model 2 + parity + gestation + breastfeeding + maternal education + amount mother smoked during pregnancy

Model 4: Model 3 + paternal smoking during pregnancy + child's passive exposure at ages <2 years and at 2-8 years

*Online supplements are not copyedited prior to posting.*



g-Table 6: n (%) and effect sizes for each category of wheezing and methacholine challenge and mean (sd) and mean differences for each lung function outcome by maternal exposure to her mothers' smoking in pregnancy: female offspring of smoking mothers. [The non-smoking grandparent is the comparison group throughout].

| Girls               |                         | MGM-M+         | MGM+M+         | Model 1: OR (95% CI)   | M2: AOR (95% CI)         | M3: AOR (95% CI)       | M4: AOR (95% CI)       |
|---------------------|-------------------------|----------------|----------------|------------------------|--------------------------|------------------------|------------------------|
| Wheezing trajectory | Never                   | 311 (67.9)     | 269 (68.8)     | 1.00 Ref               | 1.00 Ref                 | 1.00 Ref               | 1.00 Ref               |
|                     | Early only (6m)         | 72 (15.7)      | 58 (14.8)      | 0.93 (0.64, 1.37)      | 0.93 (0.63, 1.37)        | 0.91 (0.60, 1.39)      | 1.00 (0.64, 1.55)      |
|                     | Late only (42m)         | 47 (10.3)      | 37 (9.5)       | 0.91 (0.57, 1.44)      | 0.89 (0.56, 1.42)        | 0.95 (0.58, 1.56)      | 0.98 (0.58, 1.65)      |
|                     | Persistent              | 28 (6.1)       | 27 (6.9)       | 1.11 (0.64, 1.94)      | 1.17 (0.66, 2.08)        | 1.12 (0.60, 2.08)      | 1.08 (0.56, 2.08)      |
| Methacholine        | <0                      | 41 (20.8)      | 37 (22.6)      | 1.00 Ref               | 1.00 Ref                 | 1.00 Ref               | 1.00 Ref               |
|                     | 1 <sup>st</sup> tertile | 46 (23.4)      | 56 (34.2)      | 1.35 (0.75, 2.44)      | 1.35 (0.75, 2.45)        | 1.43 (0.74, 2.74)      | 1.49 (0.75, 2.99)      |
|                     | 2 <sup>nd</sup> tertile | 58 (29.4)      | 28 (17.1)      | 0.53 (0.28, 1.01)      | <b>0.51 (0.27, 0.97)</b> | 0.53 (0.26, 1.08)      | 0.55 (0.27, 1.16)      |
|                     | 3 <sup>rd</sup> tertile | 52 (26.4)      | 43 (26.2)      | 0.92 (0.50, 1.67)      | 0.85 (0.46, 1.57)        | 0.69 (0.35, 1.36)      | 0.86 (0.42, 1.76)      |
| Lung function       | FVC                     | 0.194 (0.932)  | 0.060 (0.954)  | -0.134 (-0.288, 0.020) | -0.137 (-0.294, 0.019)   | -0.073 (-0.245, 0.098) | -0.044 (-0.224, 0.137) |
|                     | FEV 1                   | 0.074 (0.985)  | -0.021 (0.968) | -0.096 (-0.257, 0.065) | -0.089 (-0.252, 0.074)   | 0.001 (-0.178, 0.180)  | 0.026 (-0.162, 0.213)  |
|                     | FEV 25-75               | -0.098 (1.051) | -0.130 (0.947) | -0.032 (-0.197, 0.132) | -0.014 (-0.181, 0.153)   | 0.044 (-0.140, 0.229)  | 0.042 (-0.152, 0.236)  |
|                     | FEV1:FVC ratio          | 0.880 (0.068)  | 0.886 (0.059)  | 0.006 (-0.005, 0.016)  | 0.007 (-0.004, 0.017)    | 0.009 (-0.003, 0.021)  | 0.008 (-0.004, 0.021)  |

Model 1: Unadjusted

Model 2: Model 1 + family history of asthma

Model 3: Model 2 + parity + gestation + breastfeeding + maternal education + amount mother smoked during pregnancy

Model 4: Model 3 + paternal smoking during pregnancy + child's passive exposure at ages <2 years and at 2-8 years

*Online supplements are not copyedited prior to posting.*



g-Table 7: n (%) and effect sizes for each category of wheezing and methacholine challenge and mean (sd) and mean differences for each lung function outcome by paternal exposure to his mothers' smoking in pregnancy: offspring of non-smoking mothers. [The non-smoking grandparent is the comparison group throughout]

|                           |                         | PGM-M-        | PGM+M-         | Model 1: OR (95% CI)     | M2: AOR (95% CI)       | M3: AOR (95% CI)         | M4: AOR (95% CI)         |
|---------------------------|-------------------------|---------------|----------------|--------------------------|------------------------|--------------------------|--------------------------|
| Wheezing trajectory       | Never                   | 2470 (76.2)   | 1501 (74.5)    | 1.00 Ref                 | 1.00 Ref               | 1.00 Ref                 | 1.00 Ref                 |
|                           | Early only (6m)         | 394 (12.2)    | 257 (12.8)     | 1.07 (0.91, 1.27)        | 1.08 (0.91, 1.28)      | 1.05 (0.88, 1.26)        | 1.02 (0.85, 1.22)        |
|                           | Late only (42m)         | 264 (8.1)     | 172 (8.5)      | 1.07 (0.88, 1.31)        | 1.10 (0.90, 1.35)      | 1.11 (0.90, 1.37)        | 1.07 (0.87, 1.33)        |
|                           | Persistent              | 115 (3.6)     | 86 (4.3)       | 1.23 (0.92, 1.64)        | 1.25 (0.93, 1.67)      | 1.14 (0.84, 1.54)        | 1.08 (0.79, 1.47)        |
| Methacholine              | <0                      | 316 (18.1)    | 220 (20.7)     | 1.00 Ref                 | 1.00 Ref               | 1.00 Ref                 | 1.00 Ref                 |
|                           | 1 <sup>st</sup> tertile | 478 (27.4)    | 285 (26.9)     | 0.86 (0.68, 1.07)        | 0.86 (0.68, 1.08)      | 0.84 (0.66, 1.07)        | 0.85 (0.66, 1.08)        |
|                           | 2 <sup>nd</sup> tertile | 478 (27.4)    | 261 (24.6)     | <b>0.78 (0.62, 0.99)</b> | 0.80 (0.63, 1.01)      | <b>0.77 (0.60, 0.98)</b> | <b>0.77 (0.60, 0.99)</b> |
|                           | 3 <sup>rd</sup> tertile | 475 (27.2)    | 295 (27.8)     | 0.89 (0.71, 1.12)        | 0.91 (0.72, 1.14)      | 0.95 (0.75, 1.20)        | 0.95 (0.75, 1.22)        |
| Lung function (sd scores) | FVC                     | 0.005 (1.001) | -0.011 (0.984) | -0.016 (-0.077, 0.046)   | -0.016 (-0.078, 0.046) | -0.013 (-0.077, 0.052)   | -0.014 (-0.081, 0.052)   |
|                           | FEV 1                   | 0.022 (0.984) | 0.014 (1.009)  | -0.008 (-0.070, 0.054)   | -0.012 (-0.075, 0.051) | -0.023 (-0.088, 0.042)   | -0.025 (-0.091, 0.042)   |
|                           | FEV 25-75               | 0.034 (0.998) | 0.049 (1.021)  | 0.015 (-0.048, 0.077)    | 0.012 (-0.051, 0.075)  | 0.000 (-0.065, 0.066)    | 0.001 (-0.066, 0.068)    |
|                           | FEV1:FVC ratio          | 0.885 (0.063) | 0.886 (0.066)  | 0.001 (-0.003, 0.005)    | 0.001 (-0.003, 0.005)  | 0.000 (-0.004, 0.004)    | 0.000 (-0.004, 0.004)    |

Model 1: Unadjusted

Model 2: Model 1 + family history of asthma

Model 3: Model 2 + parity + gestation + breastfeeding + maternal education + amount mother smoked during pregnancy

Model 4: Model 3 + paternal smoking during pregnancy + child's passive exposure at ages <2 years and at 2-8 years

*Online supplements are not copyedited prior to posting.*

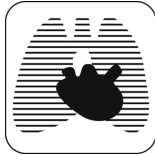

e-Table 8: n (%) and effect sizes for each category of wheezing and methacholine challenge and mean (sd) and mean differences for each lung function outcome by paternal exposure to his mothers' smoking in pregnancy: male offspring of non-smoking mothers. [The non-smoking grandparent is the comparison group throughout]

| Boys                |                         | PGM-M-         | PGM+M-        | Model 1: OR (95% CI)   | M2: AOR (95% CI)       | M3: AOR (95% CI)       | M4: AOR (95% CI)       |
|---------------------|-------------------------|----------------|---------------|------------------------|------------------------|------------------------|------------------------|
| Wheezing trajectory | Never                   | 1216 (72.6)    | 736 (72.3)    | 1.00 Ref               | 1.00 Ref               | 1.00 Ref               | 1.00 Ref               |
|                     | Early only (6m)         | 227 (13.6)     | 141 (13.9)    | 1.03 (0.82, 1.29)      | 1.03 (0.82, 1.30)      | 0.96 (0.76, 1.23)      | 0.95 (0.74, 1.21)      |
|                     | Late only (42m)         | 155 (9.3)      | 92 (9.0)      | 0.98 (0.75, 1.29)      | 0.99 (0.75, 1.31)      | 1.00 (0.76, 1.34)      | 0.94 (0.71, 1.26)      |
|                     | Persistent              | 77 (4.6)       | 49 (4.8)      | 1.05 (0.73, 1.52)      | 1.06 (0.73, 1.53)      | 0.92 (0.62, 1.36)      | 0.88 (0.59, 1.30)      |
| Methacholine        | <0                      | 144 (16.3)     | 99 (19.2)     | 1.00 Ref               | 1.00 Ref               | 1.00 Ref               | 1.00 Ref               |
|                     | 1 <sup>st</sup> tertile | 246 (27.9)     | 133 (25.8)    | 0.79 (0.56, 1.10)      | 0.78 (0.56, 1.09)      | 0.75 (0.53, 1.07)      | 0.77 (0.54, 1.10)      |
|                     | 2 <sup>nd</sup> tertile | 248 (28.1)     | 127 (24.6)    | 0.74 (0.53, 1.04)      | 0.75 (0.54, 1.06)      | 0.71 (0.50, 1.01)      | 0.74 (0.52, 1.06)      |
|                     | 3 <sup>rd</sup> tertile | 244 (27.7)     | 157 (30.4)    | 0.94 (0.68, 1.30)      | 0.94 (0.68, 1.31)      | 0.96 (0.68, 1.35)      | 0.98 (0.69, 1.40)      |
| Lung function       | FVC                     | -0.003 (0.996) | 0.015 (0.963) | 0.018 (-0.069, 0.105)  | 0.016 (-0.072, 0.103)  | 0.020 (-0.071, 0.111)  | 0.019 (-0.073, 0.112)  |
|                     | FEV 1                   | 0.015 (0.986)  | 0.023 (0.985) | 0.008 (-0.079, 0.096)  | 0.001 (-0.087, 0.089)  | -0.019 (-0.110, 0.072) | -0.023 (-0.116, 0.070) |
|                     | FEV 25-75               | 0.030 (1.008)  | 0.037 (1.008) | 0.007 (-0.082, 0.096)  | 0.002 (-0.087, 0.092)  | -0.022 (-0.115, 0.072) | -0.023 (-0.119, 0.072) |
|                     | FEV1:FVC ratio          | 0.875 (0.067)  | 0.875 (0.069) | -0.000 (-0.006, 0.006) | -0.000 (-0.006, 0.006) | -0.002 (-0.009, 0.004) | -0.003 (-0.009, 0.004) |

Model 1: Unadjusted

Model 2: Model 1 + family history of asthma

Model 3: Model 2 + parity + gestation + breastfeeding + maternal education + amount mother smoked during pregnancy

Model 4: Model 3 + paternal smoking during pregnancy + child's passive exposure at ages <2 years and at 2-8 years

*Online supplements are not copyedited prior to posting.*





g-Table 9: n (%) and effect sizes for each category of wheezing and methacholine challenge and mean (sd) and mean differences for each lung function outcome by paternal exposure to his mothers' smoking in pregnancy: female offspring of non-smoking mothers. [The non-smoking grandparent is the comparison group throughout]

| Girls               |                         | PGM-M-        | PGM+M-         | Model 1: OR (95% CI)     | M2: AOR (95% CI)         | M3: AOR (95% CI)       | M4: AOR (95% CI)       |
|---------------------|-------------------------|---------------|----------------|--------------------------|--------------------------|------------------------|------------------------|
| Wheezing trajectory | Never                   | 1254 (80.0)   | 765 (76.7)     | 1.00 Ref                 | 1.00 Ref                 | 1.00 Ref               | 1.00 Ref               |
|                     | Early only (6m)         | 167 (10.7)    | 116 (11.6)     | 1.14 (0.88, 1.47)        | 1.15 (0.89, 1.48)        | 1.16 (0.89, 1.51)      | 1.10 (0.84, 1.43)      |
|                     | Late only (42m)         | 109 (7.0)     | 80 (8.0)       | 1.20 (0.89, 1.63)        | 1.25 (0.92, 1.70)        | 1.26 (0.92, 1.71)      | 1.24 (0.90, 1.70)      |
|                     | Persistent              | 38 (2.4)      | 37 (3.7)       | <b>1.60 (1.01, 2.53)</b> | <b>1.65 (1.02, 2.65)</b> | 1.56 (0.95, 2.58)      | 1.42 (0.86, 2.36)      |
| Methacholine        | <0                      | 172 (19.9)    | 121 (22.2)     | 1.00 Ref                 | 1.00 Ref                 | 1.00 Ref               | 1.00 Ref               |
|                     | 1 <sup>st</sup> tertile | 232 (26.8)    | 152 (27.9)     | 0.93 (0.68, 1.27)        | 0.94 (0.69, 1.29)        | 0.94 (0.68, 1.31)      | 0.94 (0.67, 1.31)      |
|                     | 2 <sup>nd</sup> tertile | 230 (26.6)    | 134 (24.6)     | 0.83 (0.60, 1.14)        | 0.84 (0.61, 1.16)        | 0.83 (0.59, 1.16)      | 0.81 (0.57, 1.14)      |
|                     | 3 <sup>rd</sup> tertile | 231 (26.7)    | 138 (25.3)     | 0.85 (0.62, 1.16)        | 0.87 (0.64, 1.20)        | 0.95 (0.68, 1.33)      | 0.95 (0.67, 1.33)      |
| Lung function       | FVC                     | 0.013 (1.007) | -0.035 (1.004) | -0.048 (-0.136, 0.039)   | -0.046 (-0.135, 0.043)   | -0.039 (-0.131, 0.054) | -0.046 (-0.141, 0.049) |
|                     | FEV 1                   | 0.030 (0.982) | 0.006 (1.041)  | -0.024 (-0.112, 0.065)   | -0.024 (-0.113, 0.066)   | -0.026 (-0.119, 0.066) | -0.028 (-0.122, 0.067) |
|                     | FEV 25-75               | 0.038 (0.988) | 0.059 (1.033)  | 0.021 (-0.067, 0.109)    | 0.022 (-0.067, 0.110)    | 0.018 (-0.075, 0.110)  | 0.022 (-0.072, 0.117)  |
|                     | FEV1:FVC ratio          | 0.895 (0.057) | 0.897 (0.060)  | 0.002 (-0.004, 0.007)    | 0.001 (-0.004, 0.007)    | 0.001 (-0.005, 0.006)  | 0.001 (-0.005, 0.007)  |

Model 1: Unadjusted

Model 2: Model 1 + family history of asthma

Model 3: Model 2 + parity + gestation + breastfeeding + maternal education + amount mother smoked during pregnancy

Model 4: Model 3 + paternal smoking during pregnancy + child's passive exposure at ages <2 years and at 2-8 years

*Online supplements are not copyedited prior to posting.*



g-Table 10: n (%) and effect sizes for each category of wheezing and methacholine challenge and mean (sd) and mean differences for each lung function outcome by maternal exposure to her mothers' smoking in pregnancy: offspring of non-smoking mothers. [The non-smoking grandparent is the comparison group throughout]

|                           |                         | MGM-M-         | MGM+M-        | Model 1: OR (95% CI)     | M2: AOR (95% CI)         | M3: AOR (95% CI)         | M4: AOR (95% CI)       |
|---------------------------|-------------------------|----------------|---------------|--------------------------|--------------------------|--------------------------|------------------------|
| Wheezing trajectory       | Never                   | 3255 (75.8)    | 1469 (74.1)   | 1.00 Ref                 | 1.00 Ref                 | 1.00 Ref                 | 1.00 Ref               |
|                           | Early only (6m)         | 527 (12.3)     | 250 (12.6)    | 1.05 (0.89, 1.24)        | 1.06 (0.90, 1.25)        | 1.01 (0.85, 1.20)        | 0.98 (0.82, 1.17)      |
|                           | Late only (42m)         | 351 (8.2)      | 161 (8.1)     | 1.02 (0.84, 1.24)        | 1.02 (0.83, 1.24)        | 1.01 (0.82, 1.24)        | 0.98 (0.79, 1.21)      |
|                           | Persistent              | 160 (3.7)      | 102 (5.2)     | <b>1.41 (1.09, 1.82)</b> | <b>1.40 (1.08, 1.81)</b> | <b>1.34 (1.02, 1.76)</b> | 1.26 (0.95, 1.67)      |
| Methacholine              | <0                      | 416 (18.0)     | 203 (20.1)    | 1.00 Ref                 | 1.00 Ref                 | 1.00 Ref                 | 1.00 Ref               |
|                           | 1 <sup>st</sup> tertile | 624 (27.0)     | 277 (27.4)    | 0.91 (0.73, 1.13)        | 0.89 (0.71, 1.11)        | 0.90 (0.71, 1.14)        | 0.84 (0.66, 1.06)      |
|                           | 2 <sup>nd</sup> tertile | 637 (27.6)     | 264 (26.1)    | 0.85 (0.68, 1.06)        | 0.84 (0.67, 1.05)        | 0.79 (0.62, 1.00)        | 0.74 (0.58, 0.95)      |
|                           | 3 <sup>rd</sup> tertile | 631 (27.3)     | 268 (26.5)    | 0.87 (0.70, 1.08)        | 0.87 (0.70, 1.09)        | 0.86 (0.68, 1.08)        | 0.81 (0.63, 1.03)      |
| Lung function (sd scores) | FVC                     | -0.019 (0.994) | 0.017 (0.991) | 0.036 (-0.024, 0.095)    | 0.030 (-0.030, 0.090)    | 0.045 (-0.019, 0.108)    | 0.045 (-0.020, 0.111)  |
|                           | FEV 1                   | -0.002 (0.991) | 0.046 (1.004) | 0.048 (-0.012, 0.108)    | 0.038 (-0.023, 0.099)    | 0.046 (-0.018, 0.109)    | 0.045 (-0.021, 0.111)  |
|                           | FEV 25-75               | 0.017 (0.994)  | 0.063 (1.021) | 0.046 (-0.014, 0.106)    | 0.036 (-0.025, 0.096)    | 0.043 (-0.021, 0.107)    | 0.045 (-0.022, 0.111)  |
|                           | FEV1:FVC ratio          | 0.885 (0.063)  | 0.886 (0.066) | 0.001 (-0.003, 0.005)    | 0.001 (-0.003, 0.005)    | 0.000 (-0.004, 0.004)    | -0.000 (-0.004, 0.004) |

Model 1: Unadjusted

Model 2: Model 1 + family history of asthma

Model 3: Model 2 + parity + gestation + breastfeeding + maternal education + amount mother smoked during pregnancy

Model 4: Model 3 + paternal smoking during pregnancy + child's passive exposure at ages <2 years and at 2-8 years

*Online supplements are not copyedited prior to posting.*



g-Table 11: n (%) and effect sizes for each category of wheezing and methacholine challenge and mean (sd) and mean differences for each lung function outcome by maternal exposure to her mothers' smoking in pregnancy: male offspring of non-smoking mothers. [The non-smoking grandparent is the comparison group throughout]

| Boys                |                         | MGM-M-         | MGM+M-        | Model 1: OR (95% CI)     | M2: AOR (95% CI)         | M3: AOR (95% CI)       | M4: AOR (95% CI)       |
|---------------------|-------------------------|----------------|---------------|--------------------------|--------------------------|------------------------|------------------------|
| Wheezing trajectory | Never                   | 1604 (72.9)    | 713 (69.5)    | 1.00 Ref                 | 1.00 Ref                 | 1.00 Ref               | 1.00 Ref               |
|                     | Early only (6m)         | 296 (13.5)     | 155 (15.1)    | 1.18 (0.95, 1.46)        | 1.17 (0.94, 1.45)        | 1.08 (0.86, 1.36)      | 1.06 (0.84, 1.34)      |
|                     | Late only (42m)         | 198 (9.0)      | 92 (9.0)      | 1.05 (0.80, 1.36)        | 1.07 (0.82, 1.40)        | 1.03 (0.78, 1.36)      | 0.98 (0.74, 1.30)      |
|                     | Persistent              | 103 (4.7)      | 66 (6.4)      | <b>1.44 (1.05, 1.99)</b> | <b>1.45 (1.05, 2.01)</b> | 1.40 (0.99, 1.97)      | 1.29 (0.91, 1.84)      |
| Methacholine        | <0                      | 190 (16.7)     | 85 (17.5)     | 1.00 Ref                 | 1.00 Ref                 | 1.00 Ref               | 1.00 Ref               |
|                     | 1 <sup>st</sup> tertile | 308 (27.0)     | 128 (26.3)    | 0.93 (0.67, 1.29)        | 0.88 (0.63, 1.23)        | 0.87 (0.61, 1.22)      | 0.79 (0.55, 1.12)      |
|                     | 2 <sup>nd</sup> tertile | 314 (27.5)     | 141 (29.0)    | 1.00 (0.73, 1.39)        | 0.98 (0.71, 1.36)        | 0.92 (0.65, 1.29)      | 0.85 (0.60, 1.20)      |
|                     | 3 <sup>rd</sup> tertile | 329 (28.8)     | 133 (27.3)    | 0.90 (0.65, 1.25)        | 0.90 (0.65, 1.25)        | 0.91 (0.64, 1.28)      | 0.81 (0.57, 1.16)      |
| Lung function       | FVC                     | -0.007 (0.972) | 0.044 (1.002) | 0.051 (-0.033, 0.134)    | 0.049 (-0.036, 0.134)    | 0.059 (-0.030, 0.147)  | 0.055 (-0.036, 0.146)  |
|                     | FEV 1                   | 0.007 (0.976)  | 0.064 (1.013) | 0.057 (-0.028, 0.142)    | 0.049 (-0.037, 0.134)    | 0.039 (-0.050, 0.129)  | 0.039 (-0.052, 0.131)  |
|                     | FEV 25-75               | 0.013 (0.985)  | 0.066 (1.049) | 0.054 (-0.032, 0.139)    | 0.041 (-0.046, 0.128)    | 0.032 (-0.059, 0.123)  | 0.041 (-0.052, 0.135)  |
|                     | FEV1:FVC ratio          | 0.875 (0.065)  | 0.876 (0.072) | 0.001 (-0.005, 0.006)    | 0.000 (-0.006, 0.006)    | -0.001 (-0.007, 0.005) | -0.001 (-0.007, 0.006) |

Model 1: Unadjusted

Model 2: Model 1 + family history of asthma

Model 3: Model 2 + parity + gestation + breastfeeding + maternal education + amount mother smoked during pregnancy

Model 4: Model 3 + paternal smoking during pregnancy + child's passive exposure at ages <2 years and at 2-8 years

*Online supplements are not copyedited prior to posting.*



e-Table 12: n (%) and effect sizes for each category of wheezing and methacholine challenge and mean (sd) and mean differences for each lung function outcome by maternal exposure to her mothers' smoking in pregnancy: female offspring of non-smoking mothers. [The non-smoking grandparent is the comparison group throughout]

| Girls               |                         | MGM-M-         | MGM+M-         | Model 1: OR (95% CI)     | M2: AOR (95% CI)         | M3: AOR (95% CI)         | M4: AOR (95% CI)         |
|---------------------|-------------------------|----------------|----------------|--------------------------|--------------------------|--------------------------|--------------------------|
| Wheezing trajectory | Never                   | 1651 (78.9)    | 756 (79.1)     | 1.00 Ref                 | 1.00 Ref                 | 1.00 Ref                 | 1.00 Ref                 |
|                     | Early only (6m)         | 231 (11.0)     | 95 (9.9)       | 0.90 (0.70, 1.16)        | 0.93 (0.72, 1.20)        | 0.92 (0.70, 1.20)        | 0.86 (0.65, 1.13)        |
|                     | Late only (42m)         | 153 (7.3)      | 69 (7.2)       | 0.98 (0.73, 1.33)        | 0.96 (0.71, 1.30)        | 0.99 (0.73, 1.35)        | 0.98 (0.71, 1.35)        |
|                     | Persistent              | 57 (2.7)       | 36 (3.8)       | 1.38 (0.90, 2.11)        | 1.35 (0.87, 2.09)        | 1.24 (0.78, 1.97)        | 1.19 (0.74, 1.92)        |
| Methacholine        | <0                      | 226 (19.4)     | 118 (22.5)     | 1.00 Ref                 | 1.00 Ref                 | 1.00 Ref                 | 1.00 Ref                 |
|                     | 1 <sup>st</sup> tertile | 316 (27.1)     | 149 (28.4)     | 0.90 (0.67, 1.21)        | 0.91 (0.67, 1.22)        | 0.94 (0.68, 1.29)        | 0.88 (0.63, 1.23)        |
|                     | 2 <sup>nd</sup> tertile | 323 (27.7)     | 123 (23.4)     | <b>0.73 (0.54, 0.99)</b> | <b>0.72 (0.53, 0.98)</b> | <b>0.68 (0.49, 0.95)</b> | <b>0.63 (0.45, 0.89)</b> |
|                     | 3 <sup>rd</sup> tertile | 302 (25.9)     | 135 (25.7)     | 0.86 (0.63, 1.16)        | 0.86 (0.63, 1.17)        | 0.83 (0.59, 1.15)        | 0.79 (0.56, 1.12)        |
| Lung function       | FVC                     | -0.031 (1.014) | -0.010 (0.981) | 0.022 (-0.063, 0.106)    | 0.012 (-0.074, 0.097)    | 0.030 (-0.061, 0.120)    | 0.026 (-0.068, 0.121)    |
|                     | FEV 1                   | -0.012 (1.006) | 0.028 (0.995)  | 0.040 (-0.045, 0.125)    | 0.028 (-0.058, 0.114)    | 0.048 (-0.043, 0.139)    | 0.038 (-0.057, 0.133)    |
|                     | FEV 25-75               | 0.021 (1.004)  | 0.060 (0.994)  | 0.039 (-0.045, 0.123)    | 0.030 (-0.055, 0.115)    | 0.051 (-0.040, 0.142)    | 0.036 (-0.059, 0.131)    |
|                     | FEV1:FVC ratio          | 0.895 (0.060)  | 0.897 (0.058)  | 0.001 (-0.004, 0.006)    | 0.001 (-0.004, 0.006)    | 0.001 (-0.004, 0.007)    | 0.000 (-0.005, 0.006)    |

Model 1: Unadjusted

Model 2: Model 1 + family history of asthma

Model 3: Model 2 + parity + gestation + breastfeeding + maternal education + amount mother smoked during pregnancy

Model 4: Model 3 + paternal smoking during pregnancy + child's passive exposure at ages <2 years and at 2-8 years

*Online supplements are not copyedited prior to posting.*
